# Supplementary material for: Coordinated Cell Type–Specific Epigenetic Remodeling in Prefrontal Cortex Begins before Birth and Continues into Early Adulthood
Source: PubMed Central journal article supplement (PMC3623761; doi:10.1371/journal.pgen.1003433), 2013-04-11

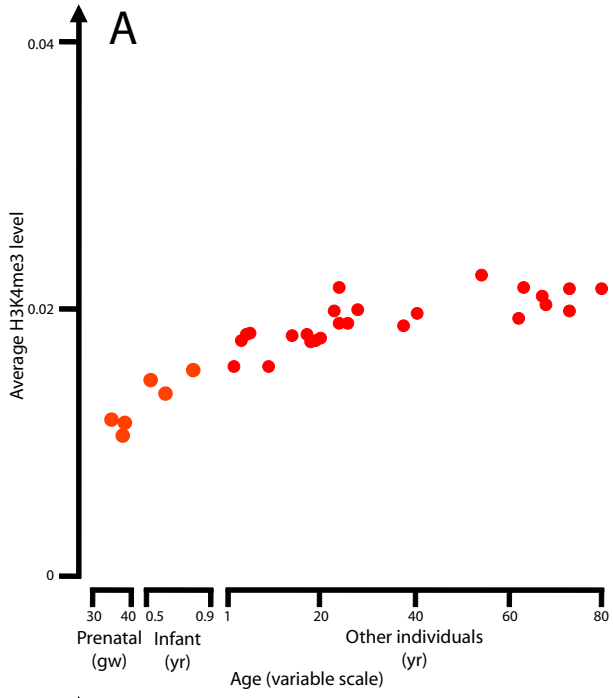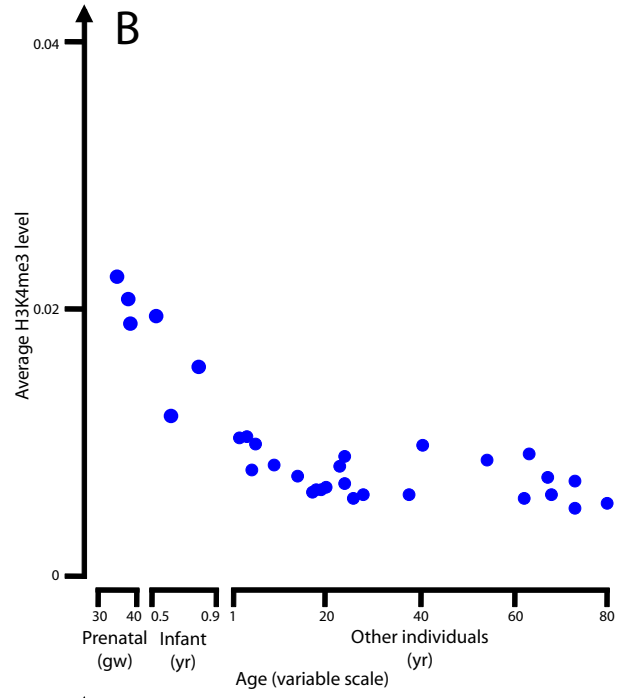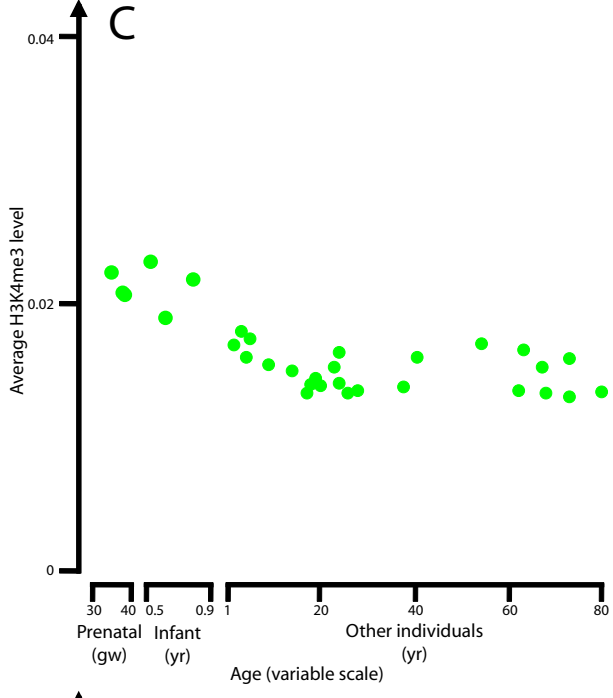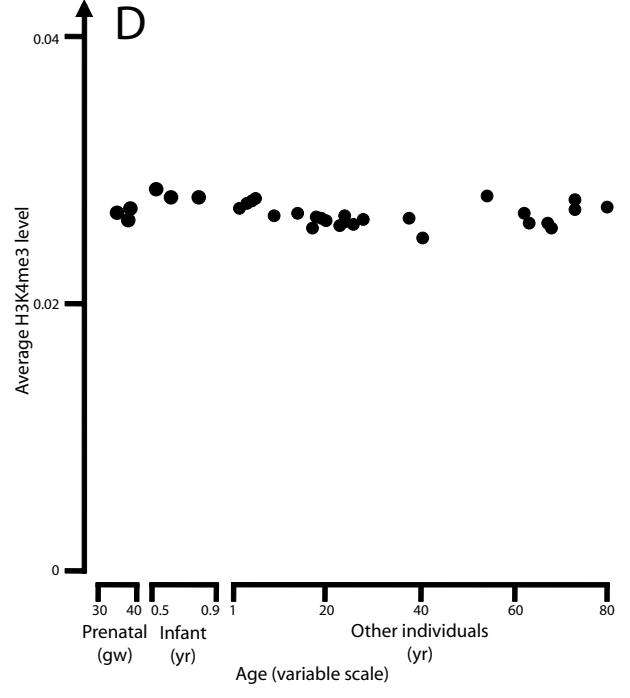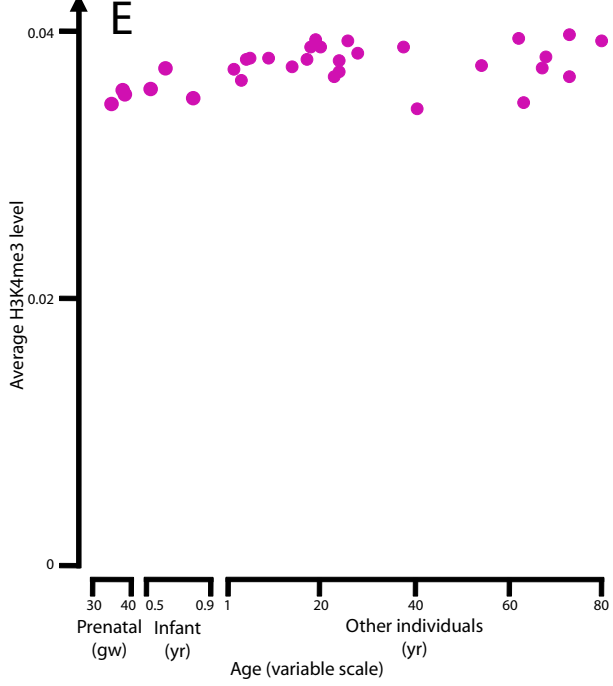

Supplement: pgen.1003433.s003.pdf [file pgen.1003433.s003.pdf]
